# Supplementary material for: Mobius Assembly: A versatile Golden-Gate framework towards universal DNA assembly
Source: PubMed Central journal article supplement (PMC5749717; doi:10.1371/journal.pone.0189892), 2018-01-02
Supplement: pone.0189892.s003.pdf [file pone.0189892.s003.pdf]

**Supporting Table 1. Colony counts for the Level 2 assembly reagents.**

|                   | Buffer-ligase combinations             |                                        |                                  |                                  |                               |                               |
|-------------------|----------------------------------------|----------------------------------------|----------------------------------|----------------------------------|-------------------------------|-------------------------------|
|                   | T4 DNA Ligase Buffer-<br>T4 DNA ligase | T4 DNA Ligase Buffer-<br>T7 DNA ligase | 2xTango Buffer-<br>T4 DNA ligase | 2xTango Buffer-<br>T7 DNA ligase | Aarl Buffer-<br>T4 DNA ligase | Aarl Buffer-<br>T7 DNA ligase |
| Replicate 1       |                                        |                                        |                                  |                                  |                               |                               |
| # blue colonies   | <b>159</b>                             | 46                                     | 7                                | 3                                | 46                            | 4                             |
| # yellow colonies | 31                                     | 12                                     | 49                               | 13                               | 4                             | 3                             |
| # white colonies  | 0                                      | 1                                      | 0                                | 0                                | 0                             | 0                             |
| Replicate 2       |                                        |                                        |                                  |                                  |                               |                               |
| # blue colonies   | <b>484</b>                             | 86                                     | 5                                | 8                                | 124                           | 10                            |
| # yellow colonies | 117                                    | 15                                     | 124                              | 75                               | 43                            | 18                            |
| # white colonies  | 8                                      | 3                                      | 2                                | 1                                | 9                             | 4                             |
| Replicate 3       |                                        |                                        |                                  |                                  |                               |                               |
| # blue colonies   | <b>298</b>                             | 162                                    | 21                               | 16                               | 54                            | 21                            |
| # yellow colonies | 90                                     | 40                                     | 167                              | 268                              | 372                           | 192                           |
| # white colonies  | 8                                      | 13                                     | 4                                | 3                                | 2                             | 3                             |
