# Supplementary material for: Mobius Assembly: A versatile Golden-Gate framework towards universal DNA assembly
Source: PubMed Central journal article supplement (PMC5749717; doi:10.1371/journal.pone.0189892), 2018-01-02
Supplement: pone.0189892.s004.pdf [file pone.0189892.s004.pdf]

**Supporting Table 2. Colony counts for the Level 2 assembly optimization.**

|                                | Replicate 1 |        |         |       |           |       |
|--------------------------------|-------------|--------|---------|-------|-----------|-------|
| Digestion (min)-Ligation (min) | 10 - 10     | 5 - 10 | 2.5 - 5 | 2 - 2 | 2.5 - 7.5 | 5 - 5 |
| # pink colonies                | 268         | 438    | 323     | 279   | 289       | 368   |
| # yellow colonies              | 9           | 28     | 14      | 9     | 26        | 13    |
| # white colonies               | 13          | 20     | 13      | 9     | 15        | 16    |
| Pink/total colonies            | 0.92        | 0.90   | 0.92    | 0.94  | 0.88      | 0.93  |
| Yellow/total colonies          | 0.03        | 0.06   | 0.04    | 0.03  | 0.08      | 0.03  |
| White/total colonies           | 0.04        | 0.04   | 0.04    | 0.03  | 0.05      | 0.04  |

|                                | Replicate 2 |        |         |       |           |       |
|--------------------------------|-------------|--------|---------|-------|-----------|-------|
| Digestion (min)-Ligation (min) | 10 - 10     | 5 - 10 | 2.5 - 5 | 2 - 2 | 2.5 - 7.5 | 5 - 5 |
| # pink colonies                | 179         | 104    | 254     | 184   | 171       | 163   |
| # yellow colonies              | 22          | 13     | 30      | 22    | 20        | 19    |
| # white colonies               | 1           | 1      | 3       | 2     | 2         | 2     |
| Pink/total colonies            | 0.89        | 0.88   | 0.89    | 0.88  | 0.89      | 0.89  |
| Yellow/total colonies          | 0.11        | 0.11   | 0.10    | 0.11  | 0.10      | 0.10  |
| White/total colonies           | 0.00        | 0.01   | 0.01    | 0.01  | 0.01      | 0.01  |

|                                | Replicate 3 |        |         |       |           |       |
|--------------------------------|-------------|--------|---------|-------|-----------|-------|
| Digestion (min)-Ligation (min) | 10 - 10     | 5 - 10 | 2.5 - 5 | 2 - 2 | 2.5 - 7.5 | 5 - 5 |
| # pink colonies                | 188         | 135    | 140     | 202   | 186       | 264   |
| # yellow colonies              | 64          | 55     | 43      | 81    | 78        | 60    |
| # white colonies               | 4           | 3      | 5       | 3     | 3         | 3     |
| Pink/total colonies            | 0.73        | 0.70   | 0.74    | 0.71  | 0.70      | 0.81  |
| Yellow/total colonies          | 0.25        | 0.28   | 0.23    | 0.28  | 0.29      | 0.18  |
| White/total colonies           | 0.02        | 0.02   | 0.03    | 0.01  | 0.01      | 0.01  |
