# Supplementary material for: Mobius Assembly: A versatile Golden-Gate framework towards universal DNA assembly
Source: PubMed Central journal article supplement (PMC5749717; doi:10.1371/journal.pone.0189892), 2018-01-02
Supplement: pone.0189892.s005.pdf [file pone.0189892.s005.pdf]

**Supporting Table 3. Vector toolkit: features and database and repository IDs**

| Vector name      | GenBank Accession numbers | Addgene Plasmid ID | Origin of replication | Antibiotic Resistance | Negative selection marker | Function                                                                                                         |
|------------------|---------------------------|--------------------|-----------------------|-----------------------|---------------------------|------------------------------------------------------------------------------------------------------------------|
| mUAV             | MG252981                  | 102680             | pMB1                  | Chloramphenicol       | amilCP                    | Conversion of a DNA fragment into a standard part                                                                |
| pMA_Level1A      | MG252982                  | 102701             | pMB1                  | Kanamycin             | spisPink                  | Level 1 cloning:<br>Assembly of standard parts into a TU or augmentation of high-order multi-TUs                 |
| pMA_Level1B      | MG252983                  | 102702             | pMB1                  | Kanamycin             | spisPink                  |                                                                                                                  |
| pMA_Level1Γ      | MG252984                  | 102703             | pMB1                  | Kanamycin             | spisPink                  |                                                                                                                  |
| pMA_Level1Δ      | MG252985                  | 102704             | pMB1                  | Kanamycin             | spisPink                  |                                                                                                                  |
| pMA_Level1A      | MG252986                  | 102705             | pMB1                  | Chloramphenicol       | sfGFP                     | Level 2 cloning:<br>Assembly of multiple TUs into a multi-TU construct or augmentation of higher order multi-TUs |
| pMA_Level1B      | MG252987                  | 102706             | pMB1                  | Chloramphenicol       | sfGFP                     |                                                                                                                  |
| pMA_Level1Γ      | MG252988                  | 102707             | pMB1                  | Chloramphenicol       | sfGFP                     |                                                                                                                  |
| pMA_Level1Δ      | MG252989                  | 102708             | pMB1                  | Chloramphenicol       | sfGFP                     |                                                                                                                  |
| pMA_Auxiliray_1  | MG252990                  | 102709             | pMB1                  | Kanamycin             | -                         | Axillary plasmids to provide overhangs in the Level 2 cloning                                                    |
| pMA_Auxiliray_2  | MG252991                  | 102710             | pMB1                  | Kanamycin             | -                         |                                                                                                                  |
| pMA_Auxiliray_3  | MG252992                  | 102711             | pMB1                  | Kanamycin             | -                         |                                                                                                                  |
| pMA_Auxiliray_4A | MG252993                  | 102712             | pMB1                  | Kanamycin             | -                         |                                                                                                                  |
| pMA_Auxiliray_4B | MG252994                  | 102713             | pMB1                  | Kanamycin             | -                         |                                                                                                                  |
| pMA_Auxiliray_4Γ | MG252995                  | 102714             | pMB1                  | Kanamycin             | -                         |                                                                                                                  |
| pMA_Auxiliray_4Δ | MG252996                  | 102715             | pMB1                  | Kanamycin             | -                         |                                                                                                                  |
